# Supplementary material
Source: PubMed Central journal article supplement (PMC3135802)
Supplement: mmc1.pdf [file mmc1.pdf]

**The American Journal of Human Genetics, Volume 89**

**Supplemental Data**

**Using VAAST to Identify an X-linked Disorder**

**Resulting in Lethality in Male Infants**

**Due to N-Terminal Acetyltransferase Deficiency**

**Alan F. Rope, Kai Wang, Rune Evjenth, Jinchuan Xing, Jennifer J. Johnston, Jeffrey J Swensen, W. Evan Johnson, Barry Moore, Chad D. Huff, Lynne M. Bird, John C. Carey, John M. Opitz, Cathy A. Stevens, Tao Jiang, Christa Schank, Heidi Deborah Fain<sup>9</sup>, Reid Robison, Brian Dalley, Steven Chin, Sarah T. South, Theodore J. Pysher, Lynn B. Jorde, Hakon Hakonarson, Johan R. Lillehaug, Leslie G. Biesecker, Mark Yandell, Thomas Arnesen, Gholson J. Lyon**

**Table S1. All Genotyped Samples (in the Shared Haplotype Region) from Family 1**

| <b>Sample Name</b>         | <b>Marker</b>           | <b>Allele 1</b>         | <b>Allele 2</b> |
|----------------------------|-------------------------|-------------------------|-----------------|
| III-4 (recent male)        | <b>DXS1227 (Xq27.2)</b> |                         | <b>90</b>       |
| II-2 (carrier mother)      |                         | <b>82</b>               | <b>90</b>       |
| III-2 (unaffected brother) |                         | <b>82</b>               |                 |
| I-2 (carrier grandmother)  |                         | <b>82</b>               | <b>90</b>       |
| II-2 (carrier aunt)        |                         | <b>82</b>               | <b>82</b>       |
| II-5 (carrier aunt)        |                         | <b>82</b>               | <b>82</b>       |
| II-6 (FFPE tissue)         |                         |                         | <b>90</b>       |
| III-7 (FFPE tissue)        |                         | <b>82</b>               |                 |
| III-4 (recent male)        |                         | <b>DXS8043 (Xq27.3)</b> |                 |
| II-2 (carrier mother)      | <b>156</b>              |                         | <b>170</b>      |
| III-2 (unaffected brother) | <b>156</b>              |                         |                 |
| I-2 (carrier grandmother)  | <b>156</b>              |                         | <b>170</b>      |
| II-2 (carrier aunt)        | <b>156</b>              |                         | <b>170</b>      |
| II-5 (carrier aunt)        | <b>156</b>              |                         | <b>170</b>      |
| II-6 (FFPE tissue)         |                         |                         | <b>170</b>      |
| III-7 (FFPE tissue)        |                         |                         | <b>170</b>      |
| III-4 (recent male)        | <b>DXS8091 (Xq28)</b>   |                         |                 |
| II-2 (carrier mother)      |                         | <b>70</b>               | <b>83</b>       |
| III-2 (unaffected brother) |                         | <b>70</b>               |                 |
| I-2 (carrier grandmother)  |                         | <b>70</b>               | <b>83</b>       |
| II-2 (carrier aunt)        |                         | <b>70</b>               | <b>83</b>       |
| II-5 (carrier aunt)        |                         | <b>70</b>               | <b>83</b>       |
| II-6 (FFPE tissue)         |                         |                         | <b>83</b>       |
| III-7 (FFPE tissue)        |                         |                         | <b>83</b>       |
| III-4 (recent male)        |                         | <b>DXS1073 (Xq28)</b>   | <b>310</b>      |
| II-2 (carrier mother)      | <b>310</b>              |                         | <b>310</b>      |
| III-2 (unaffected brother) | <b>310</b>              |                         |                 |
| I-2 (carrier grandmother)  | <b>310</b>              |                         | <b>321</b>      |
| II-2 (carrier aunt)        | <b>310</b>              |                         | <b>310</b>      |
| II-5 (carrier aunt)        | <b>310</b>              |                         | <b>310</b>      |
| II-6 (FFPE tissue)         | <b>310</b>              |                         |                 |
| III-7 (FFPE tissue)        | <b>310</b>              |                         |                 |

**Table S2. Gene Coverage in Family 1 in Shared Haplotype 14 MB Region**

| gene         | name           | exonlength | Coverage count | Gene coverage |
|--------------|----------------|------------|----------------|---------------|
| NM_005638    | <i>VAMP7</i>   | 663        | 76             | 0.11          |
| NM_001145149 | <i>VAMP7</i>   | 540        | 66             | 0.12          |
| NM_001144064 | <i>CXorf51</i> | 327        | 57             | 0.17          |
| NM_005840    | <i>SPRY3</i>   | 8584       | 4180           | 0.49          |
| NM_002186    | <i>IL9R</i>    | 1566       | 2149           | 1.37          |
| NM_001136273 | <i>ZFP92</i>   | 1250       | 6090           | 4.87          |
| NM_001666    | <i>ARHGAP4</i> | 2841       | 198326         | 69.81         |
| NM_001164741 | <i>ARHGAP4</i> | 2961       | 210991         | 71.26         |
| NM_001025243 | <i>IRAK1</i>   | 1902       | 146954         | 77.26         |
| NM_001025242 | <i>IRAK1</i>   | 2049       | 161731         | 78.93         |
| NM_001569    | <i>IRAK1</i>   | 2139       | 169309         | 79.15         |
| NM_080701    | <i>TREX2</i>   | 711        | 56311          | 79.20         |
| NM_001163257 | <i>PLXNB3</i>  | 5799       | 473352         | 81.63         |
| NM_006014    | <i>LAGE3</i>   | 432        | 35802          | 82.88         |
| NM_005393    | <i>PLXNB3</i>  | 5730       | 475950         | 83.06         |
| NM_001039582 | <i>PNCK</i>    | 1281       | 118389         | 92.42         |
| NM_001007524 | <i>F8A3</i>    | 1116       | 104709         | 93.83         |
| NM_001007523 | <i>F8A2</i>    | 1116       | 104709         | 93.83         |
| NM_014235    | <i>UBL4A</i>   | 474        | 48986          | 103.35        |
| NM_020994    | <i>CTAG2</i>   | 633        | 66416          | 104.92        |
| NM_005334    | <i>HCFC1</i>   | 6108       | 644690         | 105.55        |
| NM_004699    | <i>FAM50A</i>  | 1020       | 108286         | 106.16        |
| NM_006280    | <i>SSR4</i>    | 522        | 55629          | 106.57        |
| NM_001135740 | <i>PNCK</i>    | 1083       | 118024         | 108.98        |
| NM_001145255 | <i>IKBK</i>    | 963        | 106751         | 110.85        |
| NM_002910    | <i>RENBP</i>   | 1284       | 143731         | 111.94        |
| NM_001395    | <i>DUSP9</i>   | 1155       | 133833         | 115.87        |
| NM_001099856 | <i>IKBK</i>    | 1464       | 170283         | 116.31        |
| NM_001099857 | <i>IKBK</i>    | 1260       | 148104         | 117.54        |
| NM_003639    | <i>IKBK</i>    | 1260       | 148104         | 117.54        |
| NM_001009613 | <i>SPANXN4</i> | 300        | 35746          | 119.15        |
| NM_014370    | <i>SRPK3</i>   | 1704       | 204129         | 119.79        |
| NM_032512    | <i>PDZD4</i>   | 2310       | 278822         | 120.70        |
| NM_017518    | <i>HAUS7</i>   | 1107       | 137547         | 124.25        |
| NM_001146151 | <i>AVPR2</i>   | 930        | 117577         | 126.43        |
| NM_001142391 | <i>SLC10A3</i> | 1347       | 171581         | 127.38        |
| NM_021806    | <i>FAM3A</i>   | 693        | 89835          | 129.63        |
| NM_181312    | <i>TAZ</i>     | 837        | 109944         | 131.35        |
| NM_005629    | <i>SLC6A8</i>  | 1908       | 250823         | 131.46        |
| NM_001142805 | <i>SLC6A8</i>  | 1878       | 248368         | 132.25        |

|              |                    |      |         |        |
|--------------|--------------------|------|---------|--------|
| NM_000033    | <i>ABCD1</i>       | 2238 | 296381  | 132.43 |
| NM_000116    | <i>TAZ</i>         | 879  | 116737  | 132.81 |
| NM_004135    | <i>IDH3G</i>       | 1182 | 157553  | 133.29 |
| NM_001142392 | <i>SLC10A3</i>     | 1576 | 212032  | 134.54 |
| NM_019848    | <i>SLC10A3</i>     | 1576 | 212032  | 134.54 |
| NM_017514    | <i>PLXNA3</i>      | 5616 | 756963  | 134.79 |
| NM_174869    | <i>IDH3G</i>       | 1143 | 154064  | 134.79 |
| NM_006730    | <i>DNASE1L1</i>    | 909  | 125626  | 138.20 |
| NM_001009934 | <i>DNASE1L1</i>    | 909  | 125626  | 138.20 |
| NM_001009932 | <i>DNASE1L1</i>    | 909  | 125626  | 138.20 |
| NM_001009933 | <i>DNASE1L1</i>    | 909  | 125626  | 138.20 |
| NM_001142806 | <i>SLC6A8</i>      | 1563 | 224607  | 143.70 |
| NM_172377    | <i>CTAG2</i>       | 543  | 79306   | 146.05 |
| NM_181313    | <i>TAZ</i>         | 747  | 109944  | 147.18 |
| NM_000054    | <i>AVPR2</i>       | 1116 | 164406  | 147.32 |
| NM_001130997 | <i>FAM58A</i>      | 685  | 101245  | 147.80 |
| NM_181311    | <i>TAZ</i>         | 789  | 116737  | 147.96 |
| NM_001110792 | <i>MECP2</i>       | 1497 | 224298  | 149.83 |
| NM_001110556 | <i>FLNA</i>        | 7944 | 1193079 | 150.19 |
| NM_001456    | <i>FLNA</i>        | 7920 | 1191123 | 150.39 |
| NM_000117    | <i>EMD</i>         | 765  | 115182  | 150.56 |
| NM_007150    | <i>ZNF185</i>      | 2070 | 313025  | 151.22 |
| NM_134445    | <i>CD99L2</i>      | 573  | 88663   | 154.73 |
| NM_000402    | <i>G6PD</i>        | 1638 | 254551  | 155.40 |
| NM_004992    | <i>MECP2</i>       | 1461 | 229822  | 157.30 |
| NM_032882    | <i>PNMA6A</i>      | 1957 | 309141  | 157.97 |
| NM_134446    | <i>CD99L2</i>      | 642  | 103384  | 161.03 |
| NM_001042351 | <i>G6PD</i>        | 1548 | 252605  | 163.18 |
| NM_003491    | <i>ARD1A/NAA10</i> | 708  | 116410  | 164.42 |
| NM_005362    | <i>MAGEA3</i>      | 1010 | 168223  | 166.56 |
| NM_152274    | <i>FAM58A</i>      | 745  | 124274  | 166.81 |
| NM_031462    | <i>CD99L2</i>      | 789  | 138330  | 175.32 |
| NM_001711    | <i>BGN</i>         | 1107 | 195912  | 176.98 |
| NM_001183    | <i>ATP6AP1</i>     | 1413 | 258088  | 182.65 |
| NM_003492    | <i>TMEM187</i>     | 1133 | 208791  | 184.28 |
| NM_024332    | <i>BRCC3</i>       | 951  | 176266  | 185.35 |
| NM_001017980 | <i>VMA21</i>       | 306  | 56795   | 185.60 |
| NM_003372    | <i>VBP1</i>        | 594  | 110381  | 185.83 |
| NM_000425    | <i>L1CAM</i>       | 3774 | 704030  | 186.55 |
| NM_001143963 | <i>L1CAM</i>       | 3747 | 700493  | 186.95 |
| NM_024003    | <i>L1CAM</i>       | 3762 | 703539  | 187.01 |
| NM_020061    | <i>OPN1LW</i>      | 1095 | 207583  | 189.57 |
| NM_013364    | <i>PNMA3</i>       | 3415 | 667881  | 195.57 |
| NM_001018055 | <i>BRCC3</i>       | 876  | 176239  | 201.19 |

|              |                |      |         |        |
|--------------|----------------|------|---------|--------|
| NM_001001344 | <i>ATP2B3</i>  | 3663 | 742325  | 202.65 |
| NM_024082    | <i>PRRG3</i>   | 696  | 142405  | 204.60 |
| NM_004709    | <i>CXorf1</i>  | 2175 | 450642  | 207.19 |
| NM_001080485 | <i>ZNF275</i>  | 1290 | 272184  | 211.00 |
| NM_001289    | <i>CLIC2</i>   | 744  | 157176  | 211.26 |
| NM_021949    | <i>ATP2B3</i>  | 3522 | 749865  | 212.91 |
| NM_001166461 | <i>MPP1</i>    | 1341 | 293285  | 218.71 |
| NM_001102576 | <i>CSAG1</i>   | 237  | 52823   | 222.88 |
| NM_153478    | <i>CSAG1</i>   | 237  | 52823   | 222.88 |
| NM_002436    | <i>MPP1</i>    | 1401 | 312633  | 223.15 |
| NM_033085    | <i>FATE1</i>   | 552  | 123719  | 224.13 |
| NM_001166460 | <i>MPP1</i>    | 1350 | 302988  | 224.44 |
| NM_001586    | <i>TEX28</i>   | 1233 | 278056  | 225.51 |
| NM_001139457 | <i>BCAP31</i>  | 942  | 215987  | 229.29 |
| NM_002024    | <i>FMR1</i>    | 1899 | 440871  | 232.16 |
| NM_005491    | <i>MAMLD1</i>  | 2325 | 543360  | 233.70 |
| NM_001081573 | <i>GAB3</i>    | 1764 | 412959  | 234.10 |
| NM_080612    | <i>GAB3</i>    | 1761 | 412558  | 234.27 |
| NM_001493    | <i>GDI1</i>    | 1344 | 315670  | 234.87 |
| NM_005342    | <i>HMGGB3</i>  | 603  | 142303  | 235.99 |
| NM_001166462 | <i>MPP1</i>    | 1311 | 310033  | 236.49 |
| NM_080720    | <i>H2AFB3</i>  | 509  | 120669  | 237.07 |
| NM_001018025 | <i>MTCP1</i>   | 324  | 80149   | 247.37 |
| NM_177456    | <i>MAGEC3</i>  | 1180 | 292522  | 247.90 |
| NM_003828    | <i>MTMR1</i>   | 1998 | 501537  | 251.02 |
| NM_138702    | <i>MAGEC3</i>  | 1932 | 497438  | 257.47 |
| NM_005745    | <i>BCAP31</i>  | 741  | 191643  | 258.63 |
| NM_001139441 | <i>BCAP31</i>  | 741  | 191643  | 258.63 |
| NM_001363    | <i>DKC1</i>    | 1545 | 405920  | 262.73 |
| NM_001142463 | <i>DKC1</i>    | 1530 | 403674  | 263.84 |
| NM_171998    | <i>RAB39B</i>  | 642  | 171222  | 266.70 |
| NM_016249    | <i>MAGEC2</i>  | 1188 | 317683  | 267.41 |
| NM_152578    | <i>FMR1NB</i>  | 768  | 208573  | 271.58 |
| NM_173493    | <i>PASD1</i>   | 2322 | 641988  | 276.48 |
| NM_005366    | <i>MAGEA11</i> | 1290 | 360301  | 279.30 |
| NM_001011544 | <i>MAGEA11</i> | 1203 | 343389  | 285.44 |
| NM_019863    | <i>F8</i>      | 651  | 186117  | 285.89 |
| NM_001145933 | <i>TKTL1</i>   | 1773 | 506976  | 285.94 |
| NM_012253    | <i>TKTL1</i>   | 1791 | 512677  | 286.25 |
| NM_021048    | <i>MAGEA10</i> | 1175 | 336728  | 286.58 |
| NM_001011543 | <i>MAGEA10</i> | 1175 | 336728  | 286.58 |
| NM_021049    | <i>MAGEA5</i>  | 440  | 126819  | 288.23 |
| NM_005462    | <i>MAGEC1</i>  | 3429 | 989927  | 288.69 |
| NM_000132    | <i>F8</i>      | 7056 | 2046969 | 290.10 |

|              |                 |      |         |        |
|--------------|-----------------|------|---------|--------|
| NM_004961    | <i>GABRE</i>    | 1521 | 443792  | 291.78 |
| NM_001145934 | <i>TKTL1</i>    | 1623 | 475981  | 293.27 |
| NM_002025    | <i>AFF2</i>     | 3936 | 1155849 | 293.66 |
| NM_004344    | <i>CETN2</i>    | 519  | 152631  | 294.09 |
| NM_002362    | <i>MAGEA4</i>   | 1506 | 444020  | 294.83 |
| NM_001011548 | <i>MAGEA4</i>   | 1506 | 444020  | 294.83 |
| NM_001011549 | <i>MAGEA4</i>   | 1506 | 444020  | 294.83 |
| NM_001011550 | <i>MAGEA4</i>   | 1506 | 444020  | 294.83 |
| NM_006013    | <i>RPL10</i>    | 645  | 191534  | 296.95 |
| NM_000252    | <i>MTM1</i>     | 1812 | 544031  | 300.24 |
| NM_018196    | <i>TMLHE</i>    | 1266 | 383237  | 302.71 |
| NM_006123    | <i>IDS</i>      | 1032 | 313421  | 303.70 |
| NM_001012989 | <i>UBE2NL</i>   | 1155 | 354027  | 306.52 |
| NM_001166401 | <i>MAGEA8</i>   | 1563 | 480864  | 307.65 |
| NM_001166400 | <i>MAGEA8</i>   | 1563 | 480864  | 307.65 |
| NM_005364    | <i>MAGEA8</i>   | 1563 | 480864  | 307.65 |
| NM_000202    | <i>IDS</i>      | 1653 | 519671  | 314.38 |
| NM_001144006 | <i>SLITRK2</i>  | 3415 | 1084285 | 317.51 |
| NM_001144009 | <i>SLITRK2</i>  | 3415 | 1084285 | 317.51 |
| NM_001144004 | <i>SLITRK2</i>  | 3415 | 1084285 | 317.51 |
| NM_001144010 | <i>SLITRK2</i>  | 3415 | 1084285 | 317.51 |
| NM_001144003 | <i>SLITRK2</i>  | 3415 | 1084285 | 317.51 |
| NM_001144007 | <i>SLITRK2</i>  | 3415 | 1084285 | 317.51 |
| NM_001144008 | <i>SLITRK2</i>  | 3415 | 1084285 | 317.51 |
| NM_032539    | <i>SLITRK2</i>  | 3415 | 1084285 | 317.51 |
| NM_001144005 | <i>SLITRK2</i>  | 3415 | 1084285 | 317.51 |
| NM_001009614 | <i>SPANXN1</i>  | 219  | 69555   | 317.60 |
| NM_175743    | <i>MAGEA2</i>   | 1500 | 483833  | 322.56 |
| NM_052926    | <i>PNMA5</i>    | 1470 | 475993  | 323.80 |
| NM_001103150 | <i>PNMA5</i>    | 1470 | 475993  | 323.80 |
| NM_001103151 | <i>PNMA5</i>    | 1470 | 475993  | 323.80 |
| NM_001129765 | <i>NSDHL</i>    | 1122 | 366022  | 326.22 |
| NM_015922    | <i>NSDHL</i>    | 1122 | 366022  | 326.22 |
| NM_001166550 | <i>IDS</i>      | 1383 | 461914  | 333.99 |
| NM_001327    | <i>CTAG1B</i>   | 543  | 183463  | 337.87 |
| NM_139250    | <i>CTAG1A</i>   | 543  | 183463  | 337.87 |
| NM_023934    | <i>FUNDC2</i>   | 570  | 194246  | 340.78 |
| NM_001009609 | <i>SPANXN3</i>  | 426  | 145991  | 342.70 |
| NM_173078    | <i>SLITRK4</i>  | 2564 | 893820  | 348.60 |
| NM_001018024 | <i>MTCP1NB</i>  | 207  | 75629   | 365.36 |
| NM_018558    | <i>GABRQ</i>    | 1899 | 697085  | 367.08 |
| NM_005140    | <i>CNGA2</i>    | 1995 | 732889  | 367.36 |
| NM_032508    | <i>TMEM185A</i> | 1053 | 411578  | 390.86 |
| NM_004988    | <i>MAGEA1</i>   | 995  | 391414  | 393.38 |

|              |                 |      |         |         |
|--------------|-----------------|------|---------|---------|
| NM_000808    | <i>GABRA3</i>   | 1479 | 581868  | 393.42  |
| NM_004224    | <i>GPR50</i>    | 1854 | 840571  | 453.38  |
| NM_178124    | <i>CXorf40A</i> | 477  | 222061  | 465.54  |
| NM_001013845 | <i>CXorf40B</i> | 477  | 226563  | 474.97  |
| NM_001166387 | <i>MAGEA12</i>  | 1020 | 485475  | 475.96  |
| NM_001166386 | <i>MAGEA12</i>  | 1020 | 485475  | 475.96  |
| NM_005367    | <i>MAGEA12</i>  | 1020 | 485475  | 475.96  |
| NM_001048181 | <i>OPN1MW2</i>  | 1095 | 523946  | 478.49  |
| NM_000513    | <i>OPN1MW</i>   | 1095 | 523946  | 478.49  |
| NM_004909    | <i>CSAG2</i>    | 333  | 160163  | 480.97  |
| NM_001129828 | <i>CSAG3</i>    | 333  | 160163  | 480.97  |
| NM_001009615 | <i>SPANXN2</i>  | 543  | 265691  | 489.30  |
| NM_001080848 | <i>CSAG2</i>    | 384  | 211170  | 549.92  |
| NM_001129826 | <i>CSAG3</i>    | 384  | 211170  | 549.92  |
| NM_175868    | <i>MAGEA6</i>   | 1504 | 882627  | 586.85  |
| NM_005363    | <i>MAGEA6</i>   | 1504 | 882627  | 586.85  |
| NM_001080790 | <i>MAGEA9B</i>  | 1013 | 610417  | 602.58  |
| NM_005365    | <i>MAGEA9</i>   | 1527 | 1000365 | 655.12  |
| NM_016153    | <i>HSFX1</i>    | 1272 | 974432  | 766.06  |
| NM_001164415 | <i>HSFX2</i>    | 1272 | 974432  | 766.06  |
| NM_001017991 | <i>H2AFB2</i>   | 348  | 268548  | 771.69  |
| NM_012151    | <i>F8A1</i>     | 1131 | 1008804 | 891.96  |
| NM_153488    | <i>MAGEA2B</i>  | 1010 | 1117400 | 1106.34 |
| NM_175742    | <i>MAGEA2</i>   | 1010 | 1118700 | 1107.62 |
| NM_005361    | <i>MAGEA2</i>   | 1010 | 1118700 | 1107.62 |
| NM_001017990 | <i>H2AFB1</i>   | 356  | 412992  | 1160.09 |

Figure 1. Sanger Sequencing Validation of *NAA10* in Family 1. III-4: Recent affected boy (hemizygous: c.109T>C; p.S37P)

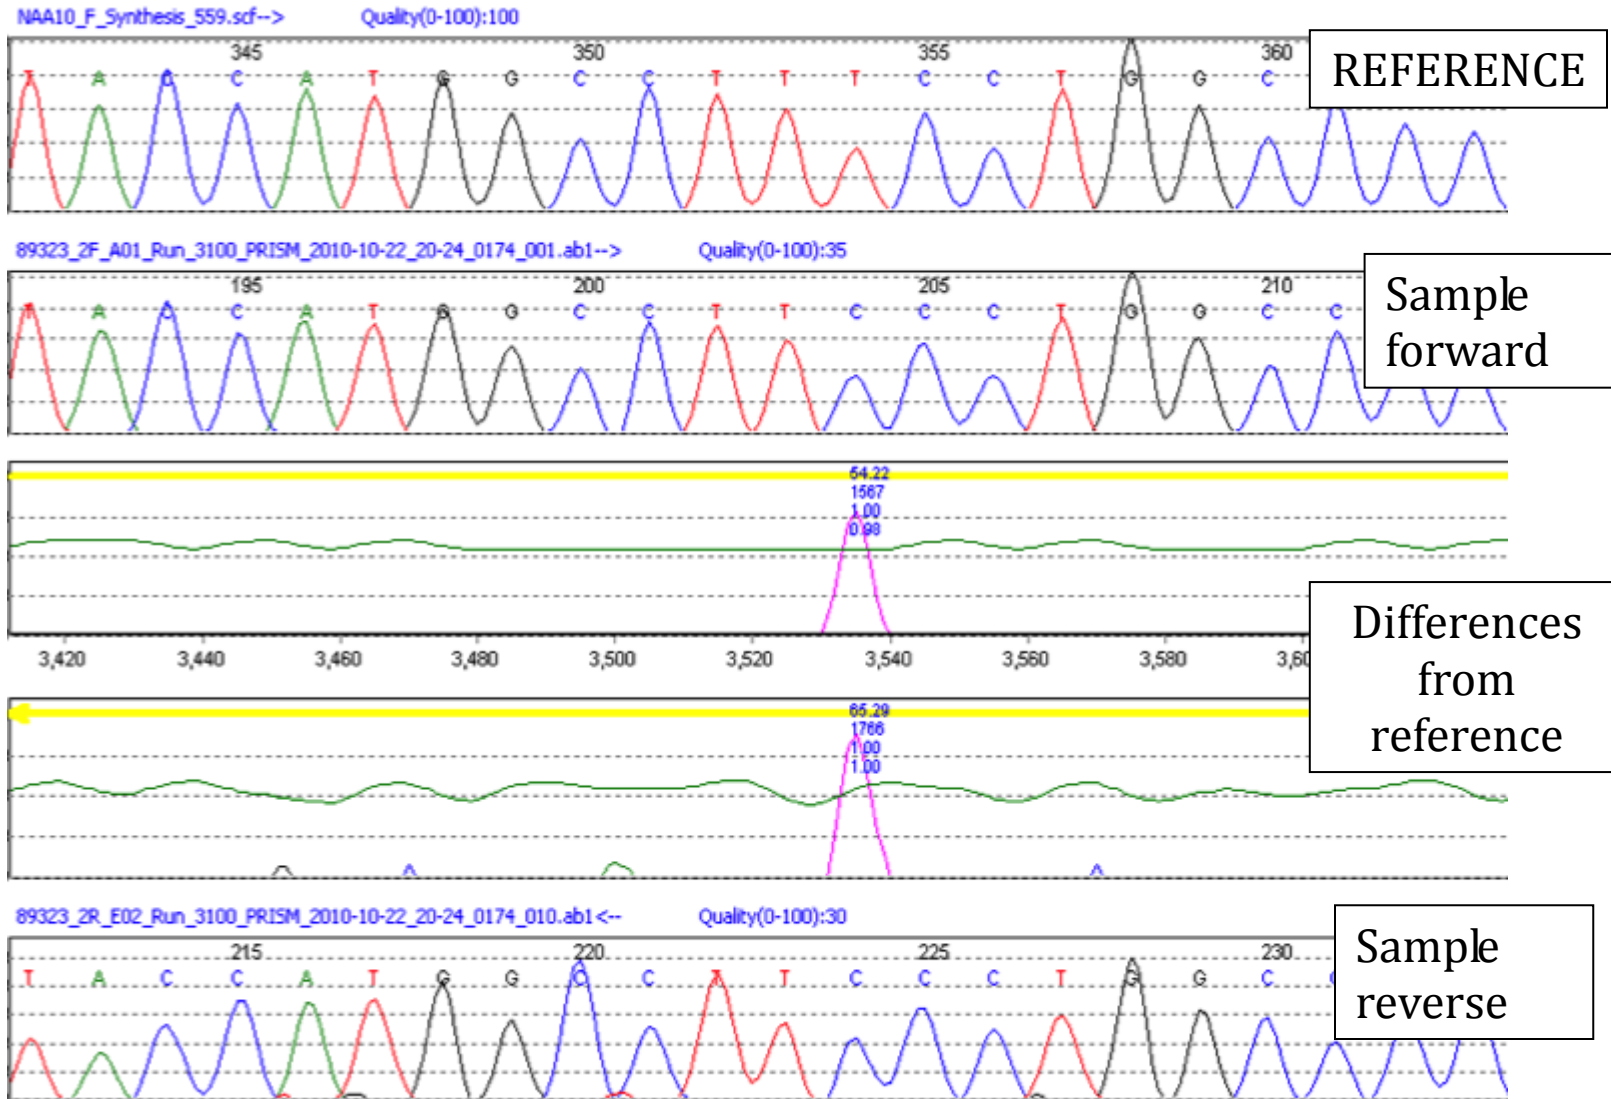



Figure S2. Sanger Sequencing Validation of *NAA10*. III-2: Unaffected brother (wild-type)

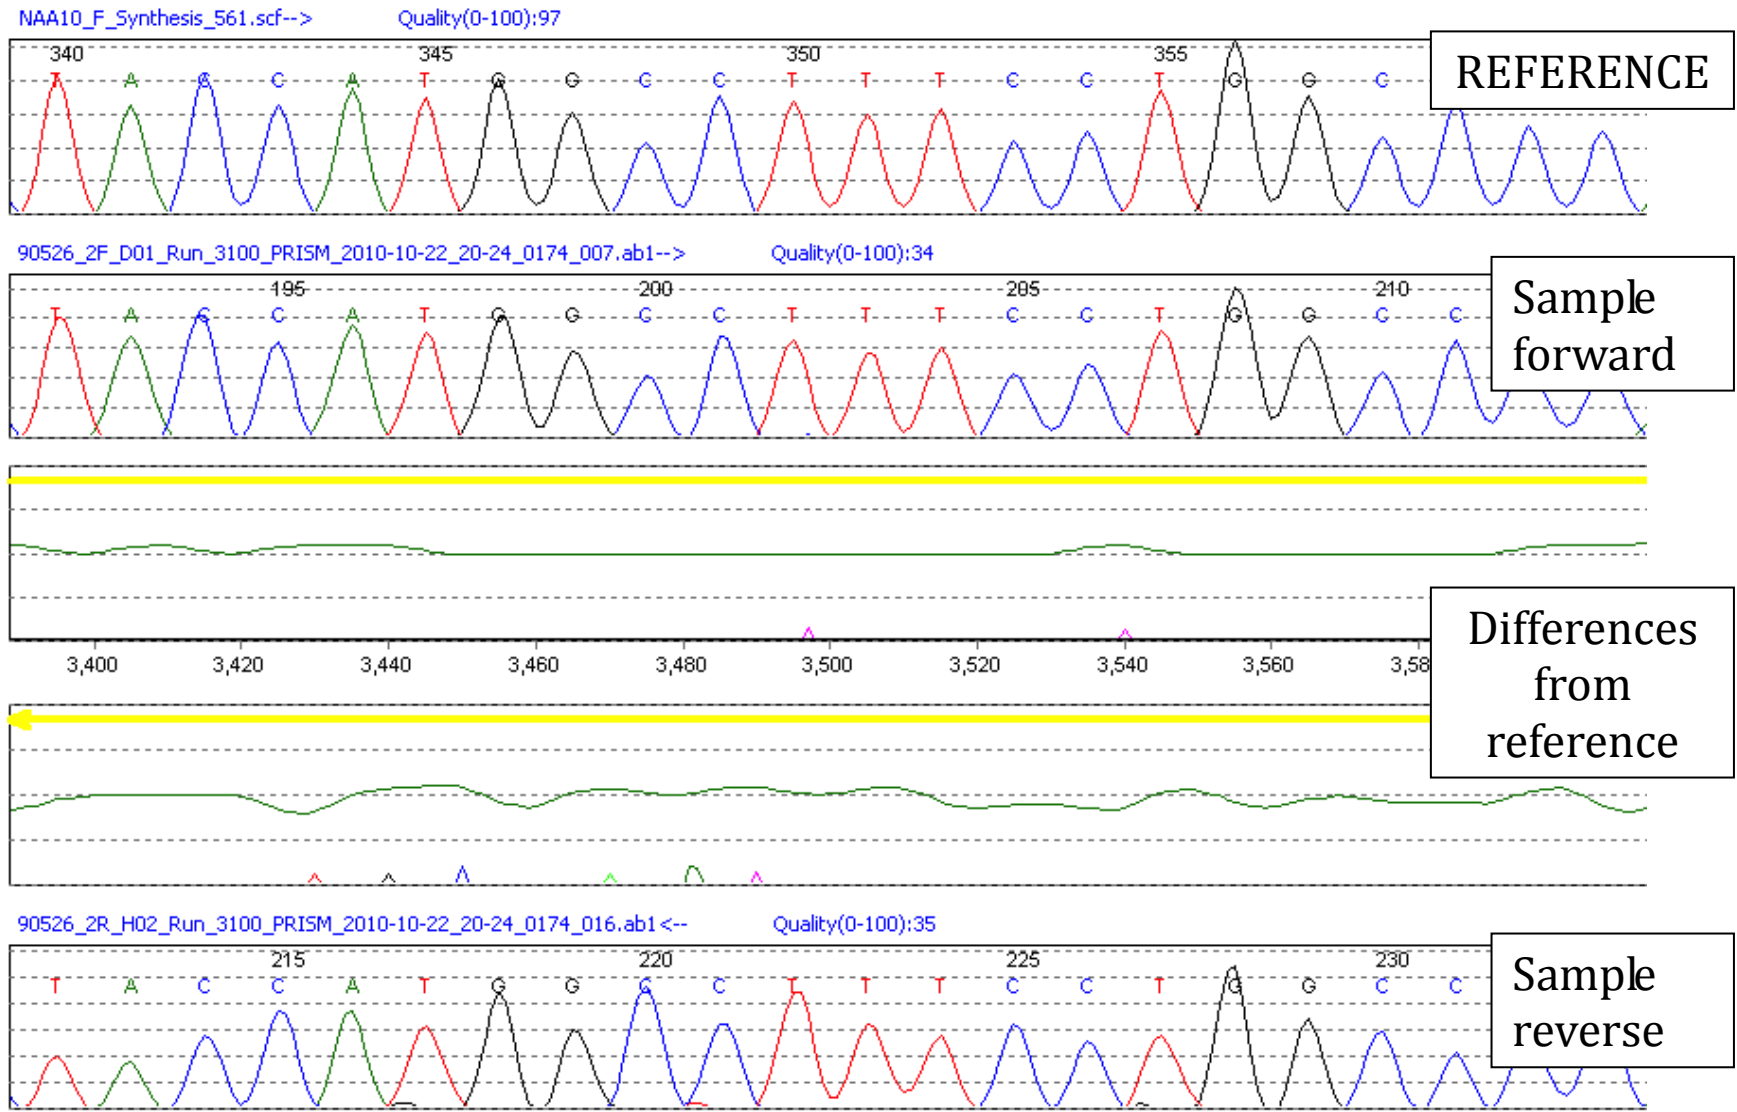

Figure S3. Sanger Sequencing Validation of *NAA10*. II-3: Aunt, Carrier (heterozygous: c.109T>C; p.S37P)

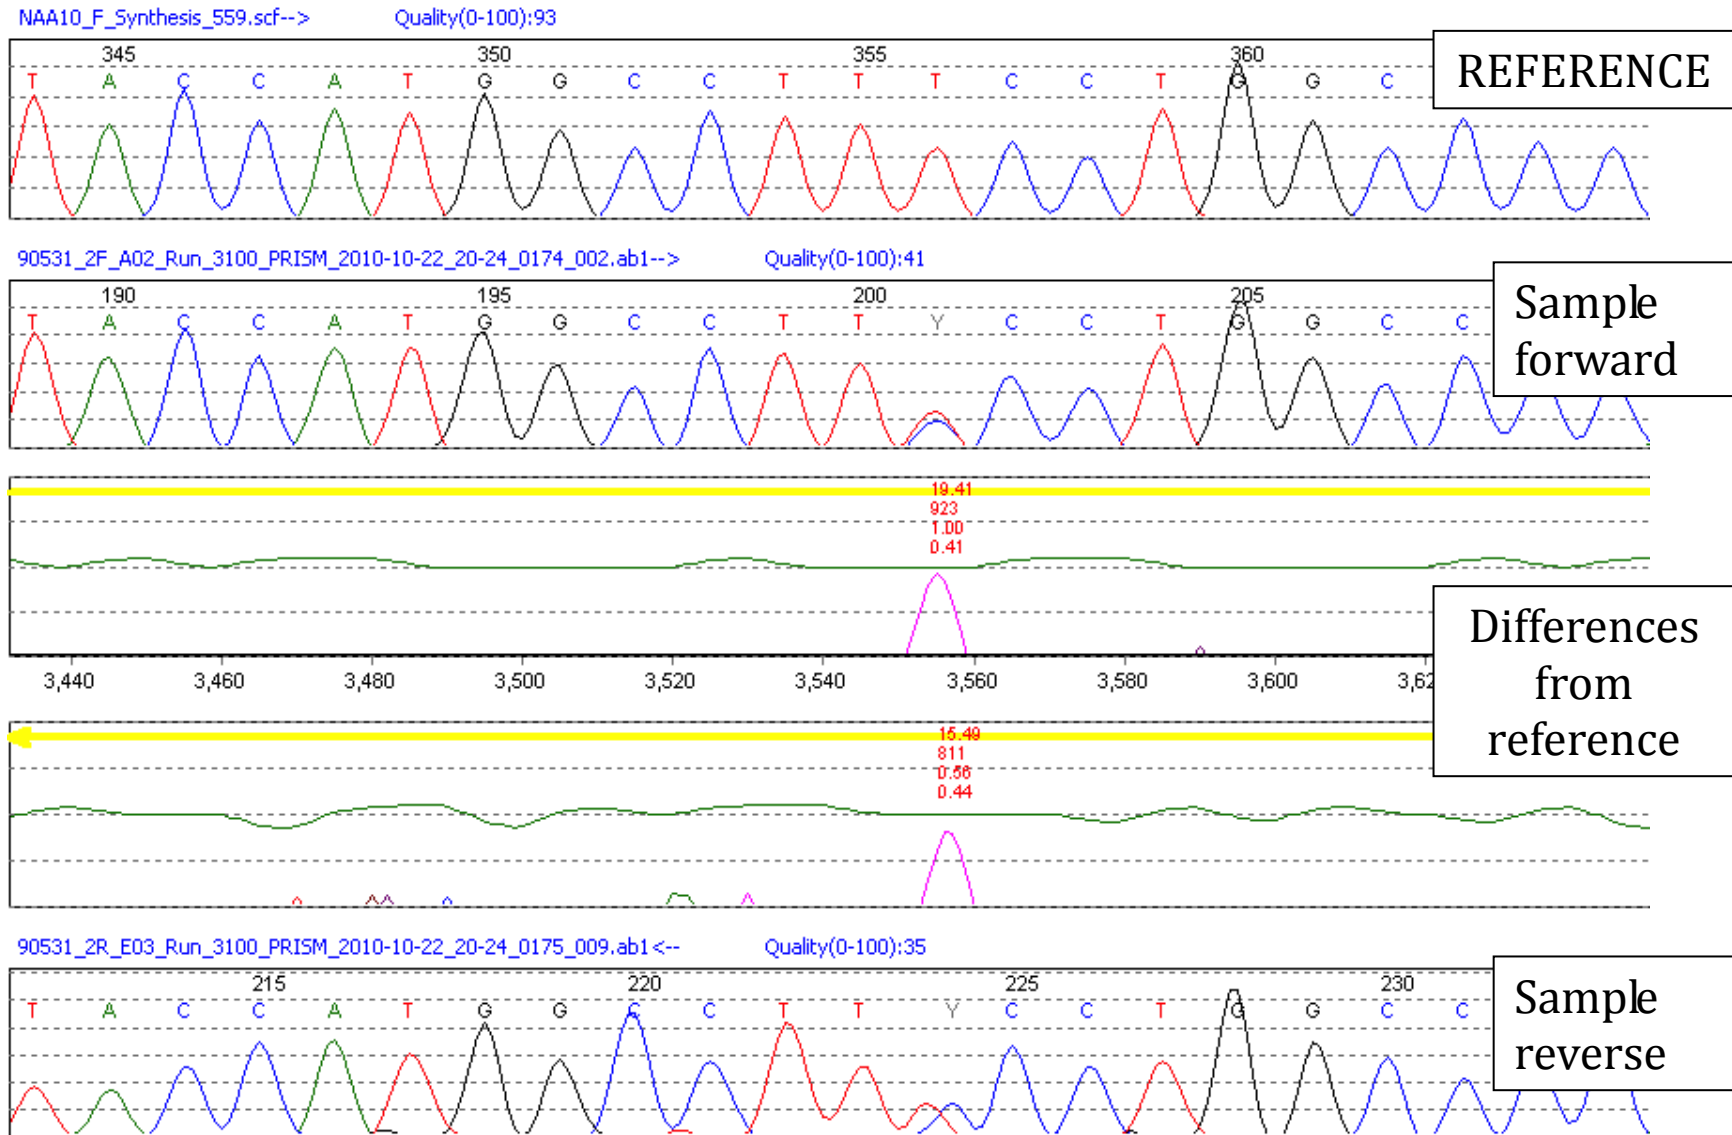

Figure S4: Sanger Sequencing Validation of *NAA10*. PCA-50-08-3A: FFPE sample from affected boy (hemizygous: c.109T>C; p.S37P)

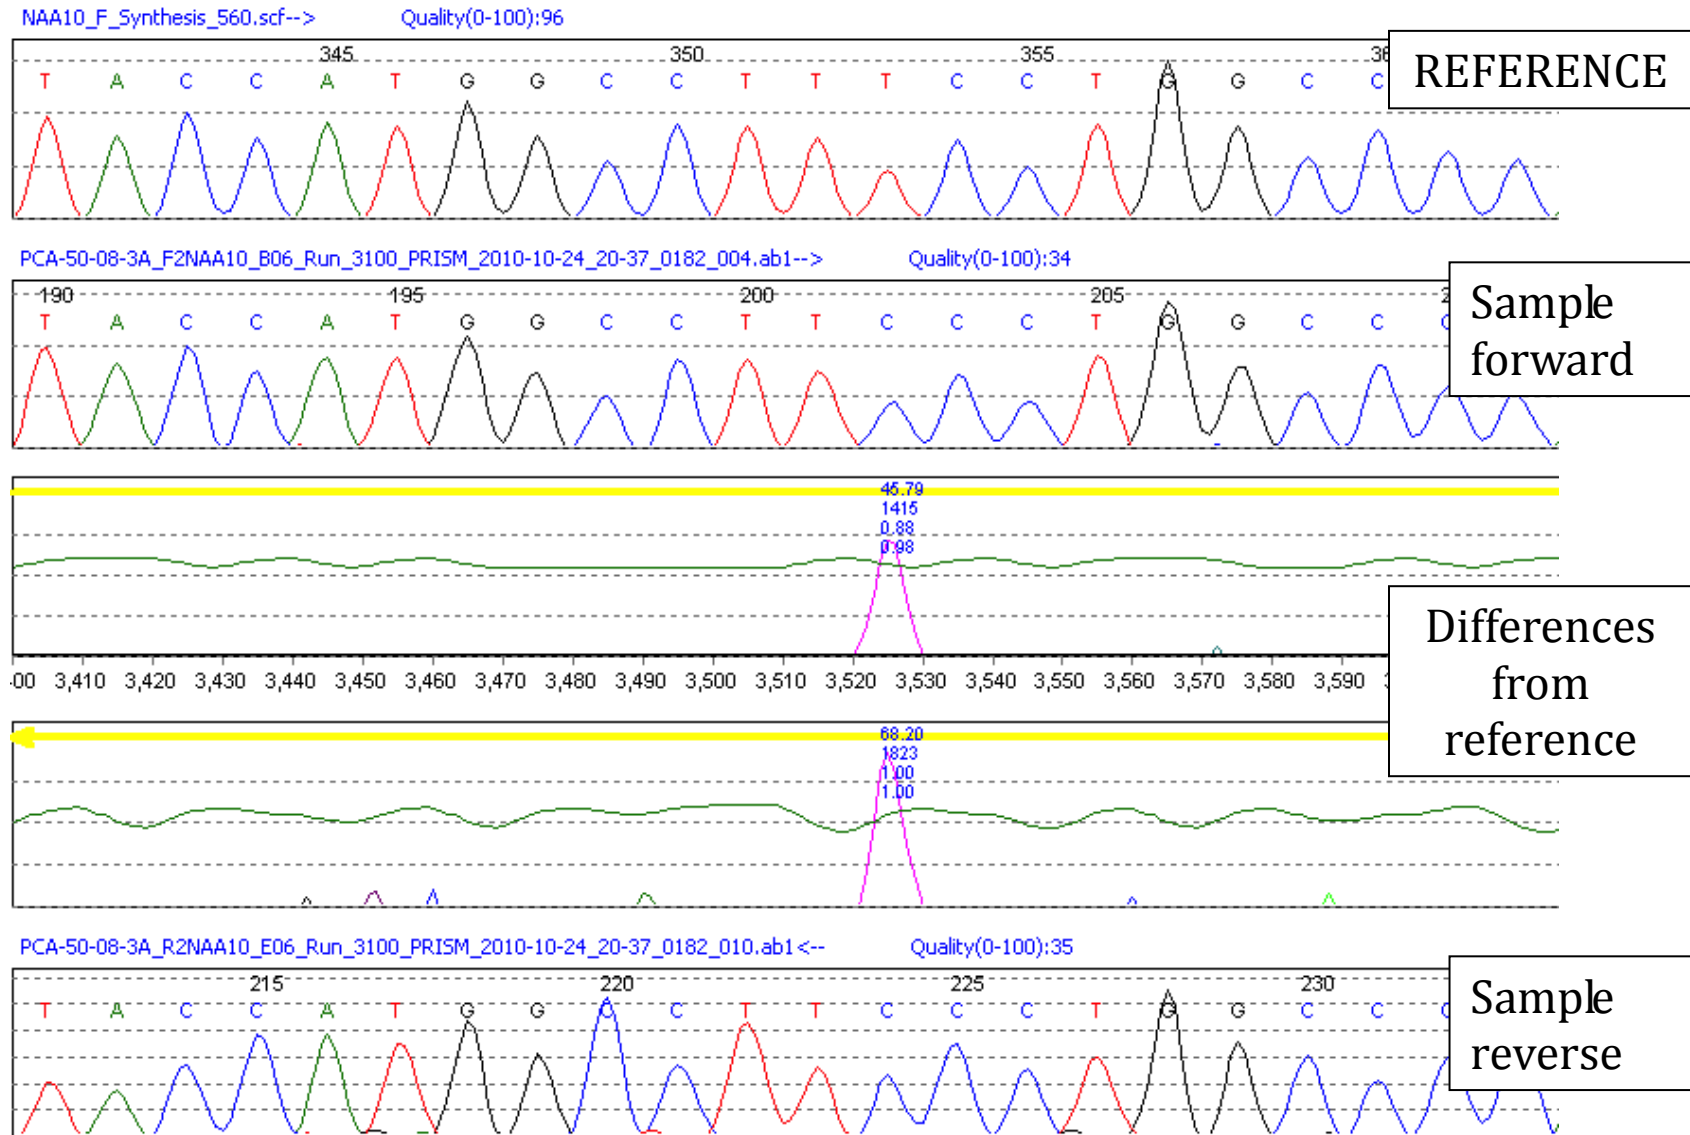

Figure S5. Sanger Sequencing Validation of *NAA10*. PA-25-88-2: FFPE sample from affected boy (hemizygous: c.109T>C; p.S37P)

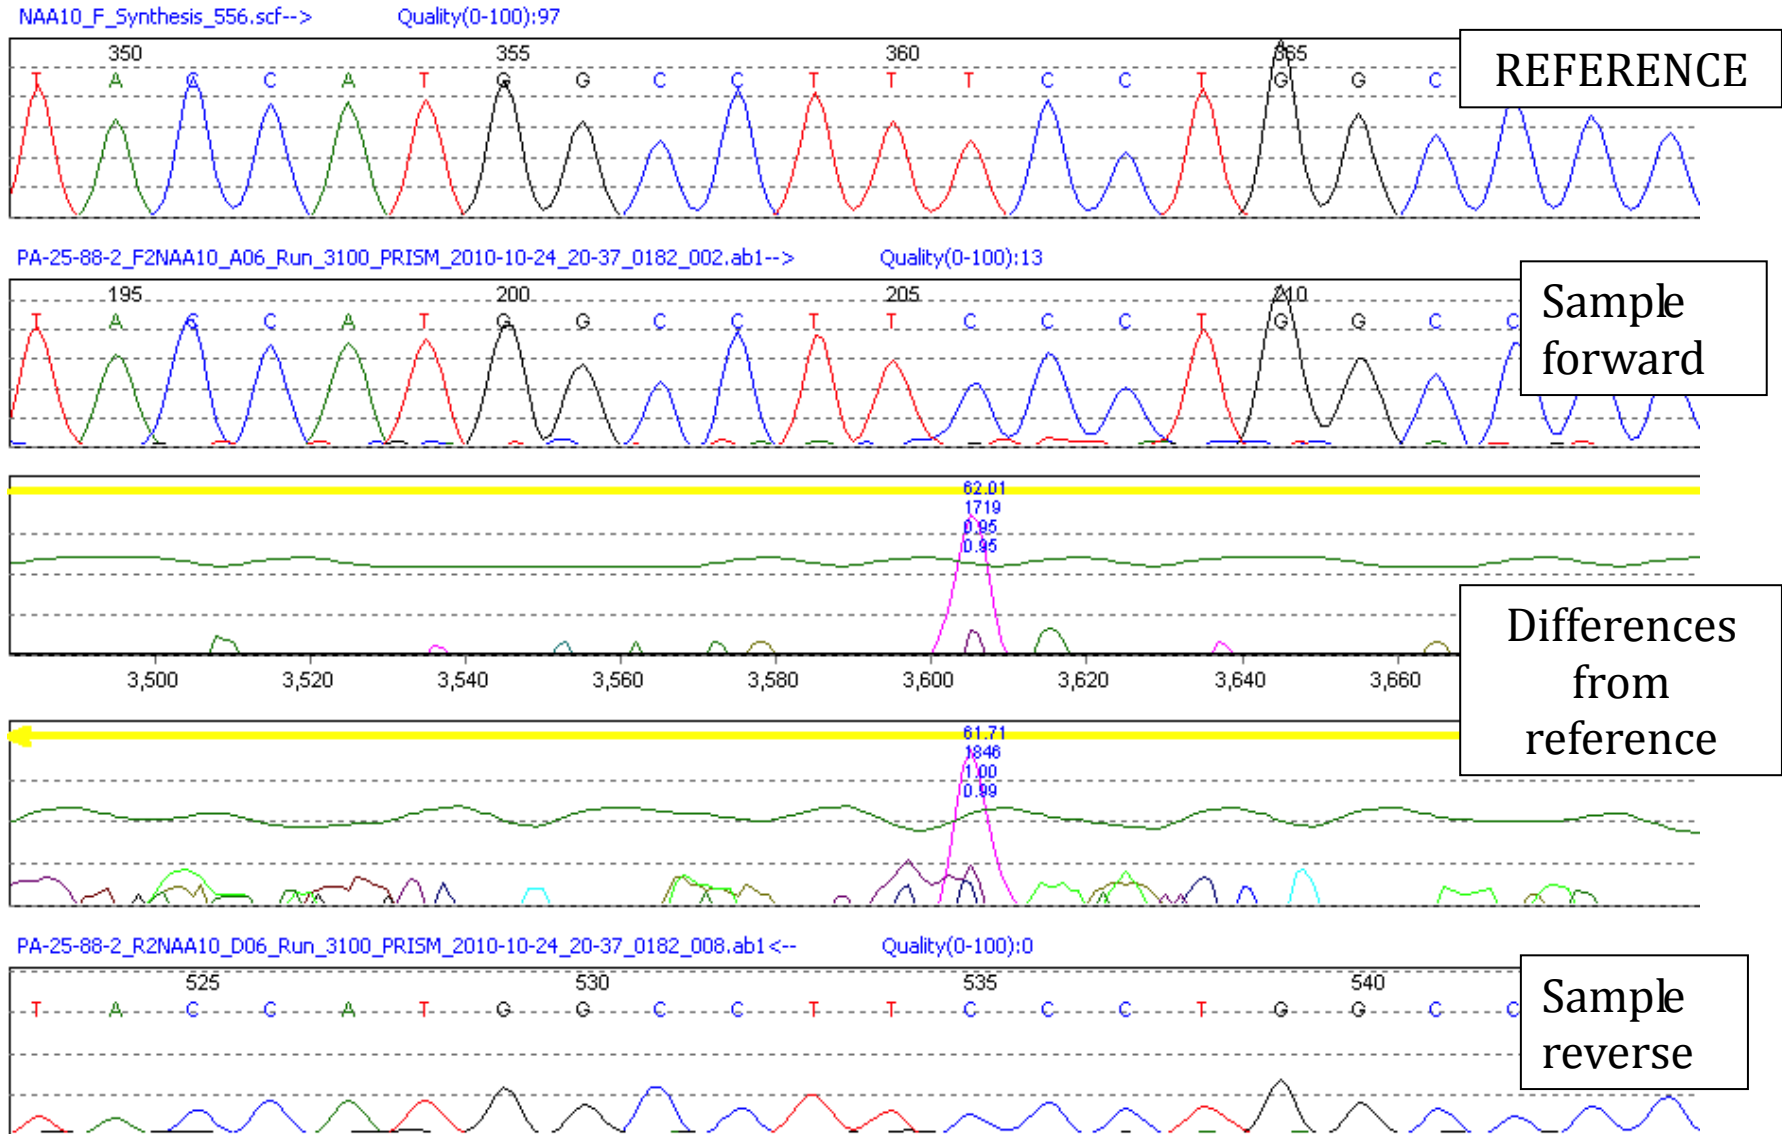

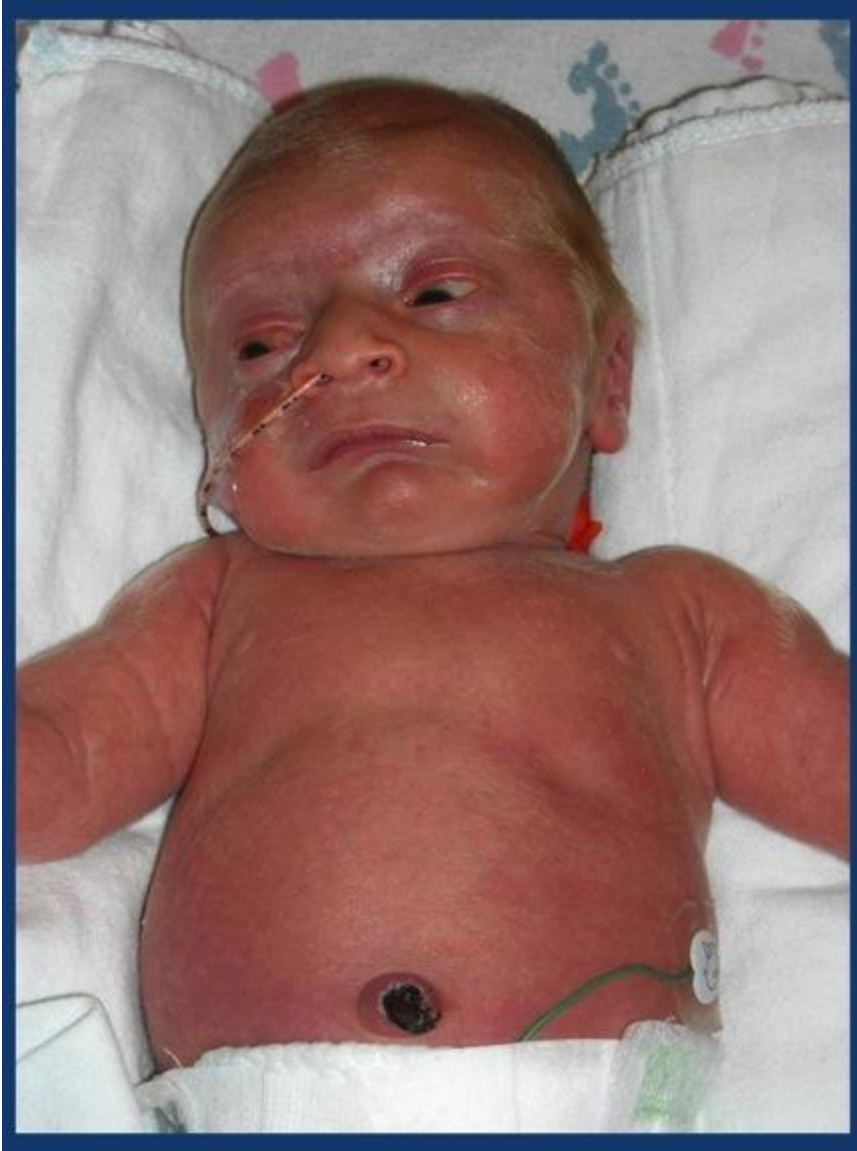

**Figure S6. Picture of III-6 in Family 1**
